# Supplementary material
Source: PubMed Central journal article supplement (PMC6304935)
Supplement: pnas.1804098115.sapp.pdf [file pnas.1804098115.sapp.pdf]

## **Supplementary Methods and Results**

**Assessing classifiers for conservation.** RF was applied to develop accurate classifiers from extremely large datasets, resulting in a simple tool to predict the probability that an unassessed species may be under some threat. We included several sampling schemes to overcome potential biases in the data, such as uneven sampling across categories and/or low sample size (Supplementary Tables 1-14). These analyses used two combinations of IUCN category listings as potential classes (i.e., response variables); specifically, we combined classes into 1) those that are of least concern (LC) vs. those that are non-LC, and 2) those that are critically endangered (CR) vs. those that are non-CR. In addition, we used down- and re-sampling approaches to balance the response variables, which has been shown to be particularly useful in biodiversity datasets.

For the ‘spatial’ datasets, error rates varied across the RF classifiers but the highest accuracy and most balanced per-category error rates were obtained using downsampled data and Red List categories coded as LC vs. non-LC (Supplementary Tables 2-6). This is due to the disparity in the sizes of the categories that occur when using the full category listings (Table 1); unequal representation results in reduced per-category accuracy. Downsampling produces balanced error rates across categories (Supplementary Tables 2-5), and should be applied in RF analyses where datasets have unequal representation across categories. To optimize the accuracy of our spatial classifiers, we ran two additional RF analyses for each continent using LC vs. non-LC as the response variable, with species that were classified incorrectly more than 90% and 80% of the time removed from the classifier. These models had lower overall error rates (80% - 90%; Supplementary Tables 2 & 4).

### **Quantifying the effect of spatial errors in the predictions**

Previous work has investigated and measured the effect of data errors present in GBIF, especially in the framework of biodiversity studies. A particularly relevant work on this is that of Maldonado et al. (1).

There, the authors sought to compare results obtained from a traditional ‘manual’ data collection (visits to herbaria and recording of data directly from curated herbaria sheets) and from a GBIF search. They did this for a specific group of plants (Rubiaceae: Cinchoneae), identifying centers of diversity for the whole group, and estimating range characteristics of each investigated plant species. Unlike some expectations, they show that the most important source of error in the identification of biodiversity patterns using GBIF is the use of observations coming from records that contain no data (NA) for the ‘Locality’ field. These are usually coordinates that are associated to observations for which no precise coordinate exists, and which were assigned to the center of the lowest known political delimitation unit (e.g., city/town, county, province/state, etc.). Their work demonstrated that removing these localities from the GBIF datasets improved the biodiversity results to make them significantly similar to those obtained using a ‘manual’ data collection. Importantly in relation to our study, they could not identify any significant differences in range characteristics (in their case, elevation range), indicating that these errors should not be expected to affect ecological or general spatial characteristics of the taxa considered. In the framework of our study, this suggests that because we are indeed using ecological and range descriptors (climatic variables, range sizes, range spatial characteristics, etc.), it is relatively unlikely that such errors are driving the global and regional patterns we observe. To demonstrate this, we performed a partial and supplementary analysis of our dataset. We first identified the regions harboring the highest and lowest proportions of observations for which the ‘Locality’ GBIF field was empty (=‘NA’). When doing so, Central America appeared as the one presenting the lowest (0.05), and Asia as the one presenting the highest (0.29) proportion of data missing values in that field. Using an approach similar to that used by Maldonado et al., we filtered out these localities, we recalculated all variables for each taxon, and we then rebuilt our classifiers. Like with the original dataset, we then calculated the regional per-cell probabilities of belonging to a non-LC category. Finally, and using these new predictions, we compared the results obtained with the original and this newly cleaned dataset. Our results (Supplementary Figures 4 and 5) agree with those obtained by Maldonado et al.: removing these ‘misleading’ points does not affect our predictions in any obvious way. While for the Central America datasets, the results provide probability values that are extremely similar

between the two methods (median of difference in probability: -0.000749), the Asian dataset has values that are larger than the ones obtained for Central America, but which are still close to each other (median of difference in probability: 0.116). Most importantly, however, in both cases, the differences between the datasets are not only small, but they are spatially constant (bottom left panel in Supplementary Figures 4 and 5), which suggests that the error being introduced is not affecting the general conservation need pattern that we observe.

## **References**

1. Maldonado C, et al. (2015) Estimating species diversity and distribution in the era of Big Data: to what extent can we trust public databases? *Glob Ecol Biogeogr* 24(8):973-984.

**Supplementary Table 1.** Number of species used to build classifiers for the down-sampled ‘spatial’ datasets and the ‘spatial+morpho’ datasets, as well as number of species used to build classifiers where species that were misclassified 90% and 80% of the time were removed.

|                                 | Spatial                         |                             |                             |                         |                         | Spatial+Morpho            |                             |
|---------------------------------|---------------------------------|-----------------------------|-----------------------------|-------------------------|-------------------------|---------------------------|-----------------------------|
|                                 | All IUCN listing<br>downsampled | LC vs non-LC<br>downsampled | CR vs non-CR<br>downsampled | LC vs non-<br>LC rm 0.9 | LC vs non-<br>LC rm 0.8 | LC vs non-LC<br>resampled | LC vs non-LC<br>downsampled |
| <b>Africa</b>                   | 405                             | 1842                        | 162                         | 1994                    | 1944                    | 80                        | 40                          |
| <b>Africa endemics</b>          | 355                             | 1270                        | 142                         | 1434                    | 1386                    | 26                        | 13                          |
| <b>Asia</b>                     | 150                             | 526                         | 60                          | 1669                    | 1617                    | 78                        | 39                          |
| <b>Asia endemics</b>            | 120                             | 412                         | 48                          | 620                     | 597                     | 6                         | 3                           |
| <b>Australia</b>                | 25                              | 154                         | 10                          | 589                     | 576                     | 80                        | 40                          |
| <b>Australia endemics</b>       | 20                              | 110                         | 8                           | 189                     | 186                     | 46                        | 23                          |
| <b>Central America</b>          | 145                             | 512                         | 58                          | 652                     | 636                     | 100                       | 50                          |
| <b>Central America endemics</b> | 130                             | 306                         | 52                          | 368                     | 361                     | 72                        | 36                          |
| <b>Europe</b>                   | 145                             | 292                         | 58                          | 956                     | 936                     | 6                         | 3                           |
| <b>Europe endemics</b>          | 10                              | 26                          | 4                           | 121                     | 117                     | NA                        | NA                          |
| <b>North America</b>            | 35                              | 122                         | 14                          | 1247                    | 1234                    | 28                        | 14                          |
| <b>North America endemics</b>   | 25                              | 54                          | 10                          | 263                     | 261                     | NA                        | NA                          |
| <b>South America</b>            | 420                             | 2482                        | 168                         | 2591                    | 2523                    | 50                        | 25                          |
| <b>South America endemics</b>   | 390                             | 1698                        | 156                         | 2120                    | 2059                    | 32                        | 16                          |
| <b>Global species</b>           | 160                             | 690                         | 64                          | 2571                    | 2514                    | 52                        | 26                          |

**Supplementary Table 2.** Random Forest out-of-the-bag (OOB) percent error rates for all the tested datasets.

| Continent                  | Spatial           |              |              |                              |                         |                         |                     |                     | Spatial + Morpho         |                           |
|----------------------------|-------------------|--------------|--------------|------------------------------|-------------------------|-------------------------|---------------------|---------------------|--------------------------|---------------------------|
|                            | All IUCN listings | LC vs non-LC | CR vs non-CR | All IUCN listings subsampled | LC vs non-LC subsampled | CR vs non-CR subsampled | LC vs non-LC rm 0.9 | LC vs non-LC rm 0.8 | LC vs non-LC subsampling | LC vs non-LC downsampling |
| <b>Africa</b>              | 37.32             | 19.5         | 4.22         | 61.23                        | 19.83                   | 31.02                   | 18.96               | 16.67               | 5.66                     | 17.5                      |
| <b>Africa endemics</b>     | 43.11             | 21.73        | 5.12         | 63.84                        | 22.95                   | 34.72                   | 21.27               | 18.25               | 10.14                    | 16.46                     |
| <b>Asia</b>                | 21.72             | 14.97        | 1.89         | 66.89                        | 24.62                   | 33.87                   | 13.66               | 10.64               | 9.27                     | 29.98                     |
| <b>Asia endemics</b>       | 42.2              | 27.87        | 4.14         | 76.9                         | 36.1                    | 44.1                    | 27.42               | 24.79               | 9.27                     | 29.98                     |
| <b>Australia</b>           | 20.33             | 13.55        | 0.83         | 80.45                        | 27.09                   | 30.39                   | 11.38               | 8.85                | 9.12                     | 25.19                     |
| <b>Australia endemics</b>  | 44.1              | 29.23        | 2.05         | 85.87                        | 32.49                   | 54.26                   | 27.51               | 26.34               | 9.25                     | 28.72                     |
| <b>C. America</b>          | 40.7              | 27.53        | 4.39         | 66.31                        | 27.31                   | 33.14                   | 25.46               | 23.27               | 7.18                     | 24.95                     |
| <b>C. America endemics</b> | 61.46             | 39.08        | 7.55         | 71.9                         | 40.34                   | 39.42                   | 38.86               | 36.57               | 4.32                     | 24.78                     |
| <b>Europe</b>              | 20.31             | 11.4         | 3.11         | 65.33                        | 18.25                   | 23.48                   | 10.56               | 8.55                | 14.61                    | 48.24                     |
| <b>Europe endemics</b>     | 25.6              | 10.4         | 1.6          | 95.58                        | 52.03                   | 72.8                    | 7.44                | 4.27                | NA                       | NA                        |
| <b>N. America</b>          | 6.85              | 4.17         | 0.55         | 70.59                        | 25                      | 28.68                   | 2.41                | 1.46                | 8.93                     | 25.06                     |
| <b>N. America endemics</b> | 14.29             | 8.79         | 1.83         | 76.13                        | 36.88                   | 38.34                   | 4.56                | 4.6                 | NA                       | NA                        |
| <b>S. America</b>          | 44.71             | 34.69        | 3.22         | 63.39                        | 25.2                    | 35.98                   | 23.93               | 21.96               | 8.69                     | 31.69                     |
| <b>S. America endemics</b> | 48.94             | 25.25        | 3.66         | 64.6                         | 27.99                   | 37.67                   | 25.14               | 22.97               | 5.45                     | 17.73                     |
| <b>Global species</b>      | 18.13             | 11           | 1.3          | 69.7                         | 21.97                   | 24.76                   | 9.92                | 7.64                | 11.35                    | 26.54                     |

**Supplementary Table 3.** OOB error rates per category for the spatial data sets considering all IUCN categories. Full datasets included all species, without any manipulation to avoid Red List category imbalance. Downsampled datasets randomly sampled the majority class(es) to match the value of the minority class.

| <b>Data set</b>                            | <b>CR</b> | <b>EN</b> | <b>LC</b> | <b>NT</b> | <b>VU</b> |
|--------------------------------------------|-----------|-----------|-----------|-----------|-----------|
| Africa full spatial                        | 1         | 0.5402    | 0.1296    | 0.9934    | 0.4277    |
| Africa downsampled spatial                 | 0.6529    | 0.6229    | 0.3749    | 0.7389    | 0.6718    |
| Asia full spatial                          | 0.9666    | 0.9677    | 0.0279    | 1         | 0.8128    |
| Asia downsampled spatial                   | 0.7042    | 0.7845    | 0.4279    | 0.7187    | 0.7091    |
| Australia full spatial                     | 1         | 1         | 0.0245    | 0.95      | 0.9166    |
| Australia downsampled spatial              | 0.8014    | 0.8974    | 0.5609    | 0.8826    | 0.8803    |
| C. America full spatial                    | 1         | 0.7472    | 0.0911    | 1         | 0.6323    |
| C. America downsampled spatial             | 0.631     | 0.8107    | 0.3907    | 0.6597    | 0.8232    |
| Europe full spatial                        | 0.9655    | 0.807     | 0.0172    | 0.9545    | 0.7666    |
| Europe downsampled spatial                 | 0.6844    | 0.7807    | 0.3068    | 0.7858    | 0.7089    |
| N. America full spatial                    | 0.7142    | 1         | 0.0008    | 1         | 0.9687    |
| N. America downsampled spatial             | 0.5743    | 0.8516    | 0.45      | 0.7513    | 0.9018    |
| S. America full spatial                    | 0.9761    | 0.8126    | 0.2162    | 0.8555    | 0.2935    |
| S. America downsampled spatial             | 0.6396    | 0.7254    | 0.3933    | 0.6542    | 0.7571    |
| Africa full endemics spatial               | 1         | 0.5296    | 0.2073    | 0.9747    | 0.3862    |
| Africa downsampled endemic spatial         | 0.684     | 0.639     | 0.429     | 0.759     | 0.6811    |
| Asia full endemic spatial                  | 0.9166    | 0.98      | 0.0931    | 1         | 0.7803    |
| Asia downsampled endemic spatial           | 0.7318    | 0.8172    | 0.7224    | 0.802     | 0.7718    |
| Australia full endemic spatial             | 1         | 1         | 0.1217    | 0.92      | 0.8125    |
| Australia downsampled endemic spatial      | 0.8789    | 0.9146    | 0.7339    | 0.855     | 0.9106    |
| C. America full endemic spatial            | 1         | 0.725     | 0.3716    | 1         | 0.5535    |
| C. America downsampled endemic spatial     | 0.6633    | 0.8237    | 0.5525    | 0.6963    | 0.8591    |
| Europe full endemic spatial                | 1         | 1         | 0.0329    | 0.7619    | 1         |
| Europe downsampled endemic spatial         | 0.9984    | 0.933     | 0.9468    | 0.9286    | 0.9718    |
| N. America full endemic spatial            | 0.6       | 1         | 0         | 0.9333    | 1         |
| N. America downsampled endemic spatial     | 0.5916    | 0.8848    | 0.6143    | 0.8429    | 0.8727    |
| S. America full endemic spatial            | 0.9871    | 0.7963    | 0.3582    | 0.847     | 0.2399    |
| S. America downsampled endemic spatial     | 0.6416    | 0.7253    | 0.4484    | 0.6653    | 0.7494    |
| Global full spatial                        | 1         | 0.9537    | 0.0121    | 0.9769    | 0.9024    |
| Global downsampled spatial                 | 0.7443    | 0.8459    | 0.4087    | 0.7032    | 0.7857    |
| <b>mean all data sets</b>                  | 0.8249    | 0.8305    | 0.3155    | 0.8537    | 0.7516    |
| <b>mean full data sets</b>                 | 0.9461    | 0.8392    | 0.0725    | 0.9648    | 0.6883    |
| <b>mean downsampled data sets</b>          | 0.6697    | 0.7819    | 0.4149    | 0.7416    | 0.7789    |
| <b>mean full endemics data sets</b>        | 0.8794    | 0.8780    | 0.1748    | 0.8774    | 0.7331    |
| <b>mean downsampled endemics data sets</b> | 0.7414    | 0.8197    | 0.6353    | 0.7927    | 0.8309    |

**Supplementary Table 4.** OOB error rates per category for the spatial data sets using LC and non-LC as the response categories. Full datasets included all species, without any manipulation to avoid Red List category imbalance. Downsampled datasets randomly sampled the majority class(es) to match the value of the minority class.

| <b>Data set</b>                   | <b>LC</b> | <b>noLC</b> |
|-----------------------------------|-----------|-------------|
| Africa full spatial               | 0.1873    | 0.2041      |
| Africa downsampled spatial        | 0.2136    | 0.183       |
| Africa full spatial rm at 0.9     | 0.1798    | 0.201       |
| Africa full spatial rm at 0.8     | 0.16      | 0.1745      |
| Asia full spatial                 | 0.0357    | 0.768       |
| Asia downsampled spatial          | 0.2781    | 0.2143      |
| Asia full spatial rm at 0.9       | 0.0329    | 0.7479      |
| Asia full spatial rm at 0.8       | 0.0252    | 0.7046      |
| Australia full spatial            | 0.0397    | 0.7922      |
| Australia downsampled spatial     | 0.2653    | 0.2765      |
| Australia full spatial rm at 0.9  | 0.0379    | 0.7704      |
| Australia full spatial rm at 0.8  | 0.0284    | 0.75        |
| C. America full spatial           | 0.1851    | 0.4179      |
| C. America downsampled spatial    | 0.2992    | 0.247       |
| C. America full spatial rm at 0.9 | 0.1766    | 0.38        |
| C. America full spatial rm at 0.8 | 0.1641    | 0.3458      |
| Europe full spatial               | 0.0354    | 0.5547      |
| Europe downsampled spatial        | 0.2053    | 0.1598      |
| Europe full spatial rm at 0.9     | 0.0366    | 0.5182      |
| Europe full spatial rm at 0.8     | 0.0293    | 0.4705      |
| N. America full spatial           | 0.0041    | 0.7868      |
| N. America downsampled spatial    | 0.2496    | 0.2504      |
| N. America full spatial rm at 0.9 | 0.0041    | 0.6578      |
| N. America full spatial rm at 0.8 | 0.0033    | 0.56        |
| S. America full spatial           | 0.2933    | 0.2048      |
| S. America downsampled spatial    | 0.2707    | 0.2332      |
| S. America full spatial rm at 0.9 | 0.284     | 0.1986      |
| S. America full spatial rm at 0.8 | 0.2613    | 0.1849      |
| Global full spatial               | 0.0189    | 0.7072      |
| Global downsampled spatial        | 0.2407    | 0.1986      |
| Global full spatial rm at 0.9     | 0.0181    | 0.6925      |
| Global full spatial rm at 0.8     | 0.0163    | 0.6054      |
| <b>mean all data sets</b>         | 0.1337    | 0.4425      |
| <b>mean full data sets</b>        | 0.1115    | 0.5326      |
| <b>mean downsampled data sets</b> | 0.2545    | 0.2235      |
| <b>mean rm at 0.9 data sets</b>   | 0.1074    | 0.4963      |
| <b>mean rm at 0.8 data sets</b>   | 0.0959    | 0.4558      |

**Supplementary Table 4 (cont).**

| <b>Data set</b>                           | <b>LC</b> | <b>noLC</b> |
|-------------------------------------------|-----------|-------------|
| Africa full endemic spatial               | 0.2897    | 0.1604      |
| Africa downsampled endemic spatial        | 0.2444    | 0.2146      |
| Africa full endemic spatial rm at 0.9     | 0.2798    | 0.1602      |
| Africa full endemic spatial rm at 0.8     | 0.2495    | 0.1324      |
| Asia full endemic spatial                 | 0.1066    | 0.631       |
| Asia downsampled endemic spatial          | 0.3435    | 0.3785      |
| Asia full endemic spatial rm at 0.9       | 0.1066    | 0.6313      |
| Asia full endemic spatial rm at 0.8       | 0.095     | 0.6136      |
| Australia full endemic spatial            | 0.1357    | 0.6909      |
| Australia downsampled endemic spatial     | 0.3135    | 0.3363      |
| Australia full endemic spatial rm at 0.9  | 0.1428    | 0.653       |
| Australia full endemic spatial rm at 0.8  | 0.1357    | 0.6527      |
| C. America full endemic spatial           | 0.562     | 0.2706      |
| C. America downsampled endemic spatial    | 0.3856    | 0.4213      |
| C. America full endemic spatial rm at 0.9 | 0.5733    | 0.2614      |
| C. America full endemic spatial rm at 0.8 | 0.5208    | 0.2626      |
| Europe full endemic spatial               | 0         | 1           |
| Europe downsampled endemic spatial        | 0.5057    | 0.5348      |
| Europe full endemic spatial rm at 0.9     | 0         | 1           |
| Europe full endemic spatial rm at 0.8     | 0         | 1           |
| N. America full endemic spatial           | 0.0203    | 0.7037      |
| N. America downsampled endemic spatial    | 0.3331    | 0.4044      |
| N. America full endemic spatial rm at 0.9 | 0.0121    | 0.5294      |
| N. America full endemic spatial rm at 0.8 | 0.0081    | 0.6666      |
| S. America full endemic spatial           | 0.3981    | 0.156       |
| S. America downsampled endemic spatial    | 0.285     | 0.2749      |
| S. America full endemic spatial rm at 0.9 | 0.398     | 0.1553      |
| S. America full endemic spatial rm at 0.8 | 0.3661    | 0.1444      |
| <b>mean all data sets</b>                 | 0.2433    | 0.4657      |
| <b>mean full data sets</b>                | 0.2161    | 0.5161      |
| <b>mean downsampled data sets</b>         | 0.3444    | 0.3664      |
| <b>mean rm at 0.9 data sets</b>           | 0.2161    | 0.4844      |
| <b>mean rm at 0.8 data sets</b>           | 0.1965    | 0.4960      |



**Supplementary Table 5.** OOB error rates per category for the spatial data sets using CR and non-CR as the response categories. Full datasets included all species, without any manipulation to avoid Red List category imbalance. Down-sampled datasets randomly sampled the majority class(es) to match the value of the minority class.

| <b>Data set</b>                            | <b>CR</b> | <b>noCR</b> |
|--------------------------------------------|-----------|-------------|
| Africa full spatial                        | 1         | 0.002       |
| Africa downsampled spatial                 | 0.3078    | 0.3126      |
| Asia full spatial                          | 1         | 0.0012      |
| Asia downsampled spatial                   | 0.3342    | 0.3431      |
| Australia full spatial                     | 1         | 0           |
| Australia downsampled spatial              | 0.2595    | 0.3483      |
| C. America full spatial                    | 1         | 0           |
| C. America downsampled spatial             | 0.3111    | 0.3518      |
| Europe full spatial                        | 1         | 0.001       |
| Europe downsampled spatial                 | 0.2397    | 0.2299      |
| N. America full spatial                    | 1         | 0           |
| N. America downsampled spatial             | 0.2883    | 0.2852      |
| S. America full spatial                    | 1         | 0           |
| S. America downsampled spatial             | 0.3595    | 0.3601      |
| Africa full endemics spatial               | 1         | 0.0021      |
| Africa downsampled endemic spatial         | 0.3445    | 0.35        |
| Asia full endemic spatial                  | 0.9583    | 0.0049      |
| Asia downsampled endemic spatial           | 0.4385    | 0.4434      |
| Australia full endemic spatial             | 1         | 0           |
| Australia downsampled endemic spatial      | 0.5067    | 0.5784      |
| C. America full endemic spatial            | 1         | 0.0057      |
| C. America downsampled endemic spatial     | 0.3685    | 0.4183      |
| Europe full endemic spatial                | 1         | 0           |
| Europe downsampled endemic spatial         | 0.8076    | 0.6486      |
| N. America full endemic spatial            | 1         | 0           |
| N. America downsampled endemic spatial     | 0.3817    | 0.3848      |
| S. America full endemic spatial            | 1         | 0           |
| S. America downsampled endemic spatial     | 0.3827    | 0.3707      |
| Global full spatial                        | 1         | 0.0007      |
| Global downsampled spatial                 | 0.2561    | 0.2391      |
| <b>mean all data sets</b>                  | 0.6848    | 0.1894      |
| <b>mean full data sets</b>                 | 0.8750    | 0.0005      |
| <b>mean downsampled data sets</b>          | 0.3000    | 0.3187      |
| <b>mean full endemics data sets</b>        | 0.9940    | 0.0018      |
| <b>mean downsampled endemics data sets</b> | 0.4615    | 0.4563      |

**Supplementary Table 6.** OOB error rates per category for the spatial+morpho data sets using LC and non-LC as response categories. Downsampled datasets randomly sampled the majority class(es) to match the value of the minority class. Resampled datasets randomly sampled the majority class(es) to double that of the minority, in order to increase the minority class count.

| <b>Data set</b>                           | <b>LC</b> | <b>noLC</b> |
|-------------------------------------------|-----------|-------------|
| Global downsampled                        | 26.66     | 26.43       |
| Global resampled                          | 16.14     | 6.56        |
| Africa downsampled                        | 16.54     | 18.2        |
| Africa subssampled                        | 7.72      | 3.61        |
| Africa downsampled endemic                | 30.59     | 9.89        |
| Africa resampled endemic                  | 7.98      | 12.3        |
| Asia downsampled                          | 22.99     | 36.96       |
| Asia subssampled                          | 12.01     | 6.52        |
| Asia downsampled endemic                  | 22.99     | 36.96       |
| Asia resampled endemic                    | 12.01     | 6.52        |
| Australia downsampled                     | 23.16     | 27.22       |
| Australia subssampled                     | 12.91     | 5.33        |
| Australia downsampled endemic             | 26.38     | 31.07       |
| Australia resampled endemic               | 12.11     | 6.39        |
| C. America downsampled                    | 22.51     | 27.39       |
| C. America resampled                      | 8.81      | 5.55        |
| C. America full endemic                   | 17.17     | 32.39       |
| C. America resampled endemic              | 3.28      | 5.36        |
| Europe downsampled                        | 44.72     | 51.74       |
| Europe subssampled                        | 21.34     | 7.88        |
| N. America downsampled                    | 23.54     | 26.57       |
| N. America resampled                      | 14.33     | 52.11       |
| S. America downsampled                    | 29.28     | 34.1        |
| S. America resampled                      | 11.03     | 6.34        |
| S. America downsampled endemic            | 14.2      | 23.24       |
| S. America resampled endemic              | 6.49      | 4.4         |
| <b>mean all data sets</b>                 | 17.95731  | 19.655      |
| <b>mean downsampled data sets</b>         | 26.55143  | 31.72       |
| <b>mean resampled data sets</b>           | 11.245    | 5.22375     |
| <b>mean downsampled endemic data sets</b> | 22.266    | 26.71       |
| <b>mean resampled endemic data sets</b>   | 8.374     | 6.994       |

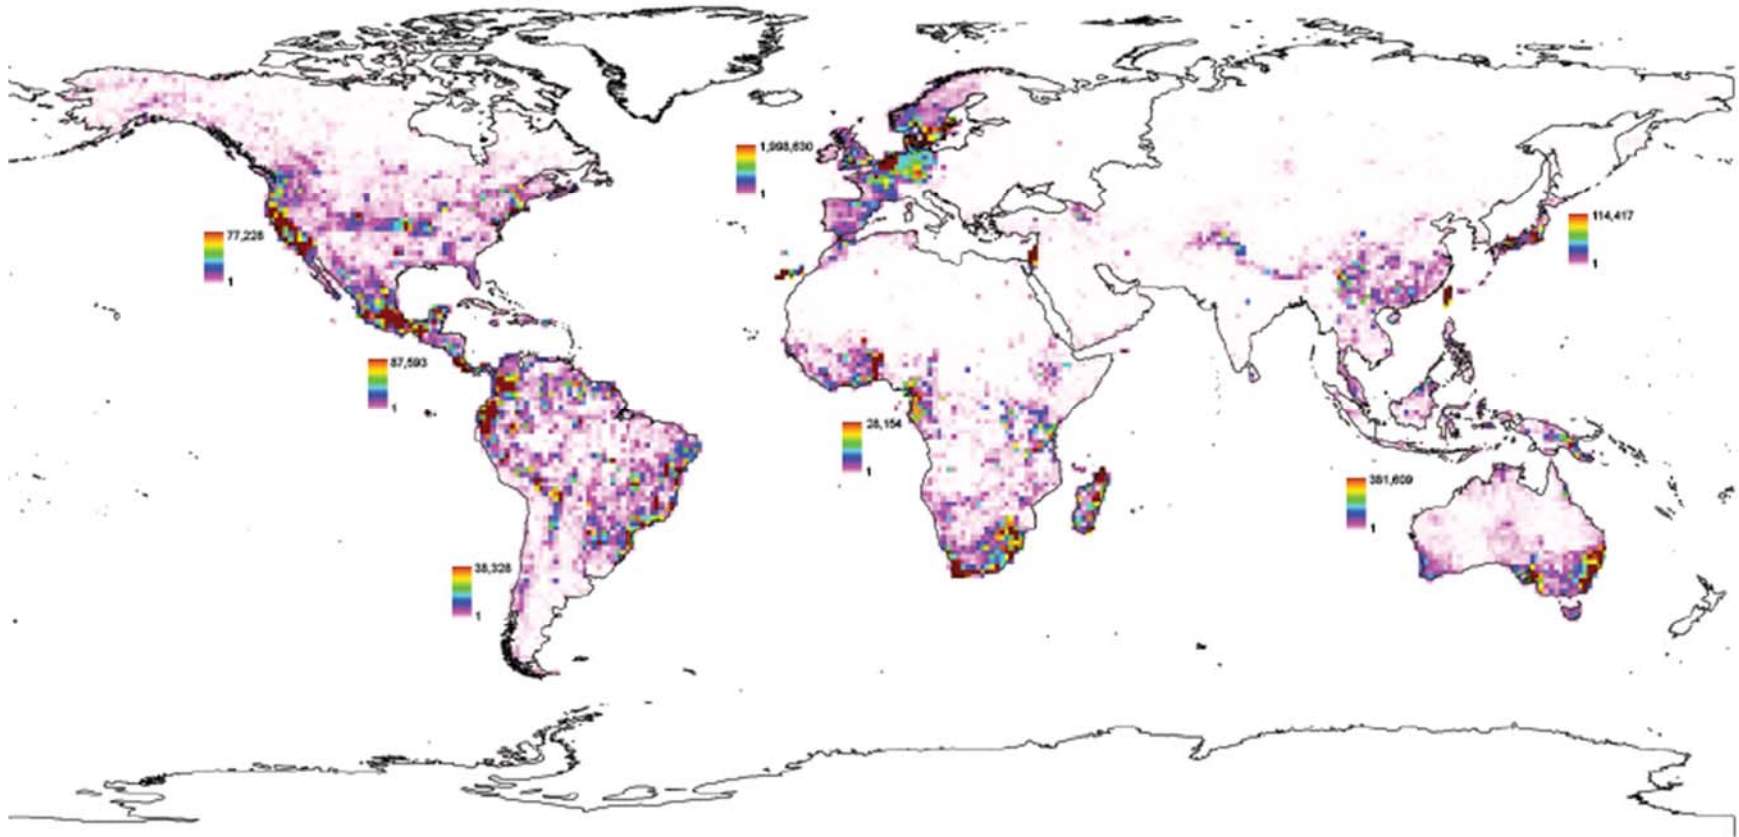

**Supplementary Figure 1.** Map of all georeferenced localities downloaded from GBIF. The number of localities per grid cell are on a log-scale and are separate for each continent. Only unique localities from each species were counted.

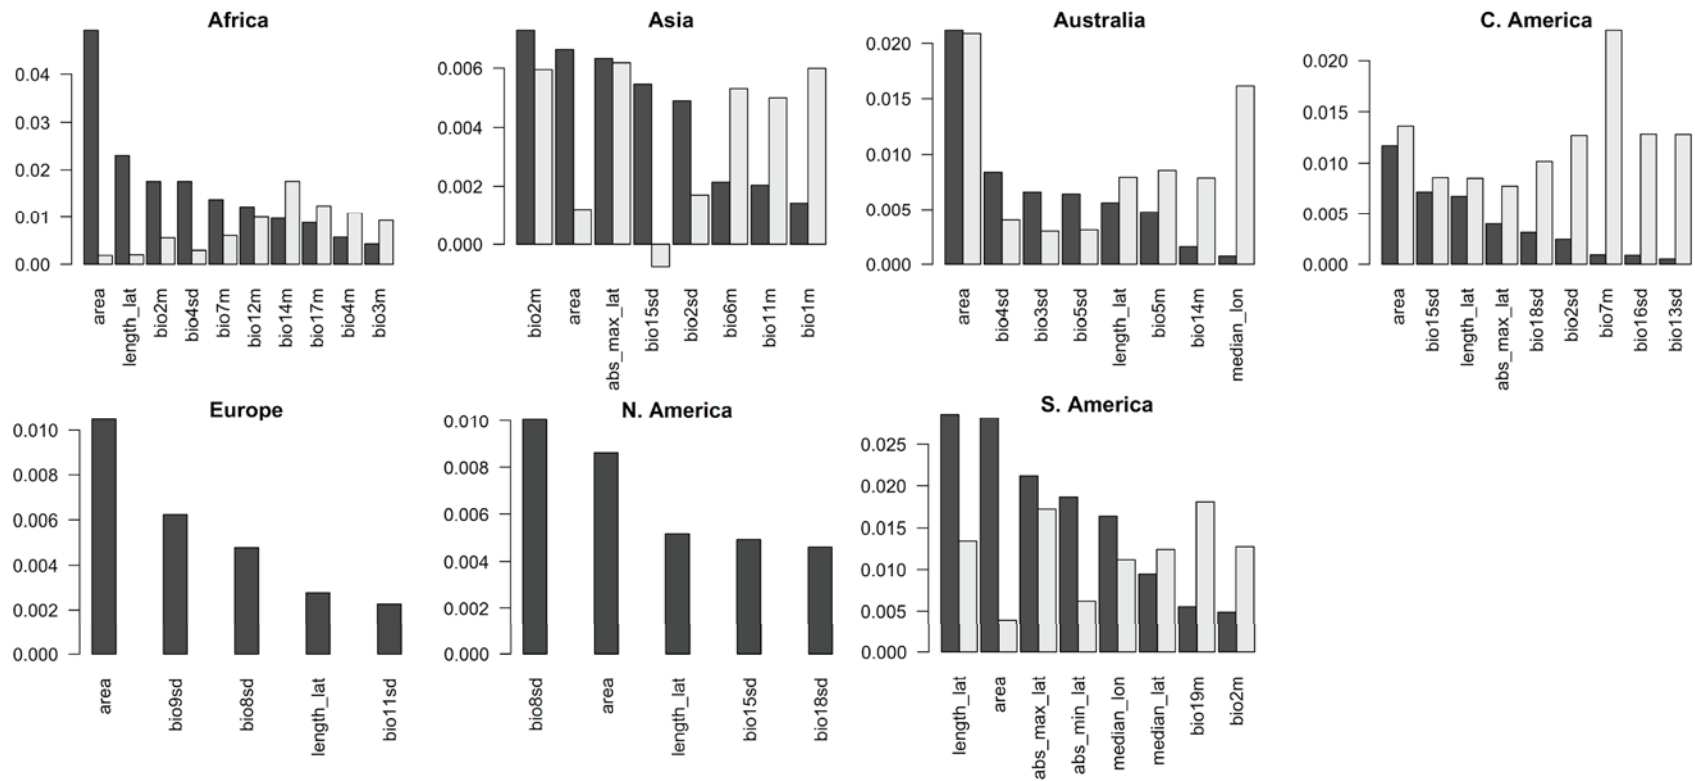

**Supplementary Figure 2.** Variable importance for the continental endemic datasets ranked by the mean decrease in accuracy. Black bars: ‘spatial’ dataset. Grey bars: ‘spatial+morpho’ dataset. Only the top five predictor variables for each model are included for simplicity, and are ordered according to the ‘spatial’ data.

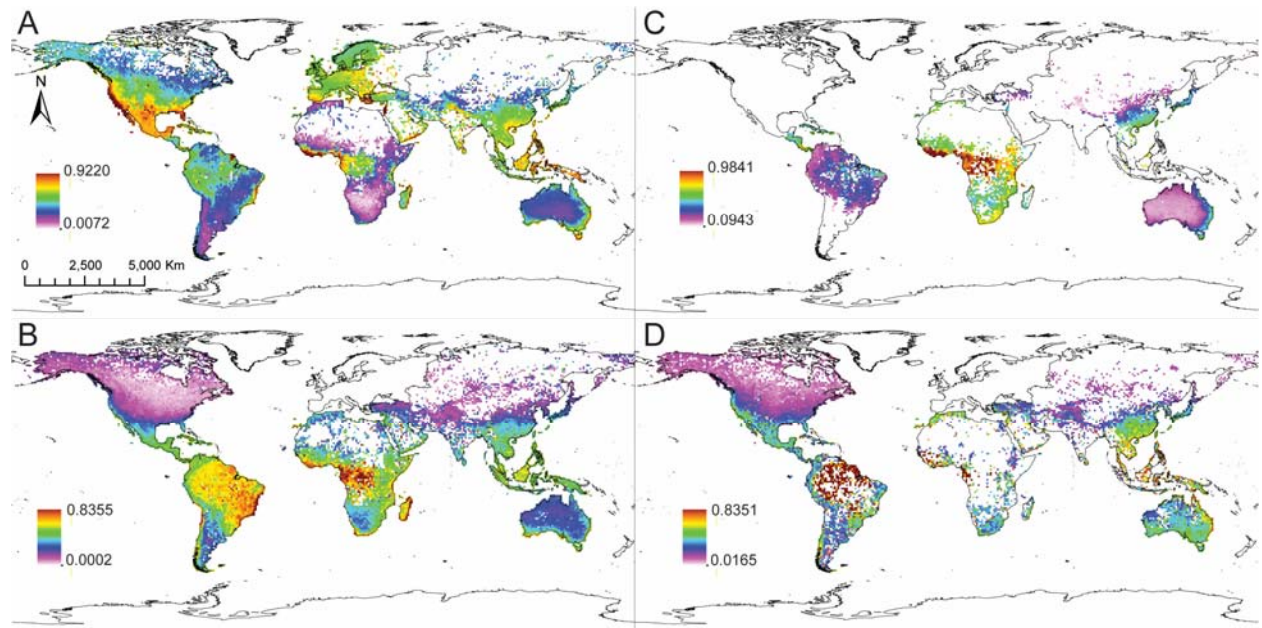

**Supplementary Figure 3.** Average per grid-cell probability of being listed as non-LC calculated by the RF classifier using the ‘spatial’ endemic (A), ‘spatial+morpho’ endemic (B), ‘spatial’ global (C), and ‘spatial+morpho’ global (D) datasets. See scales for values.

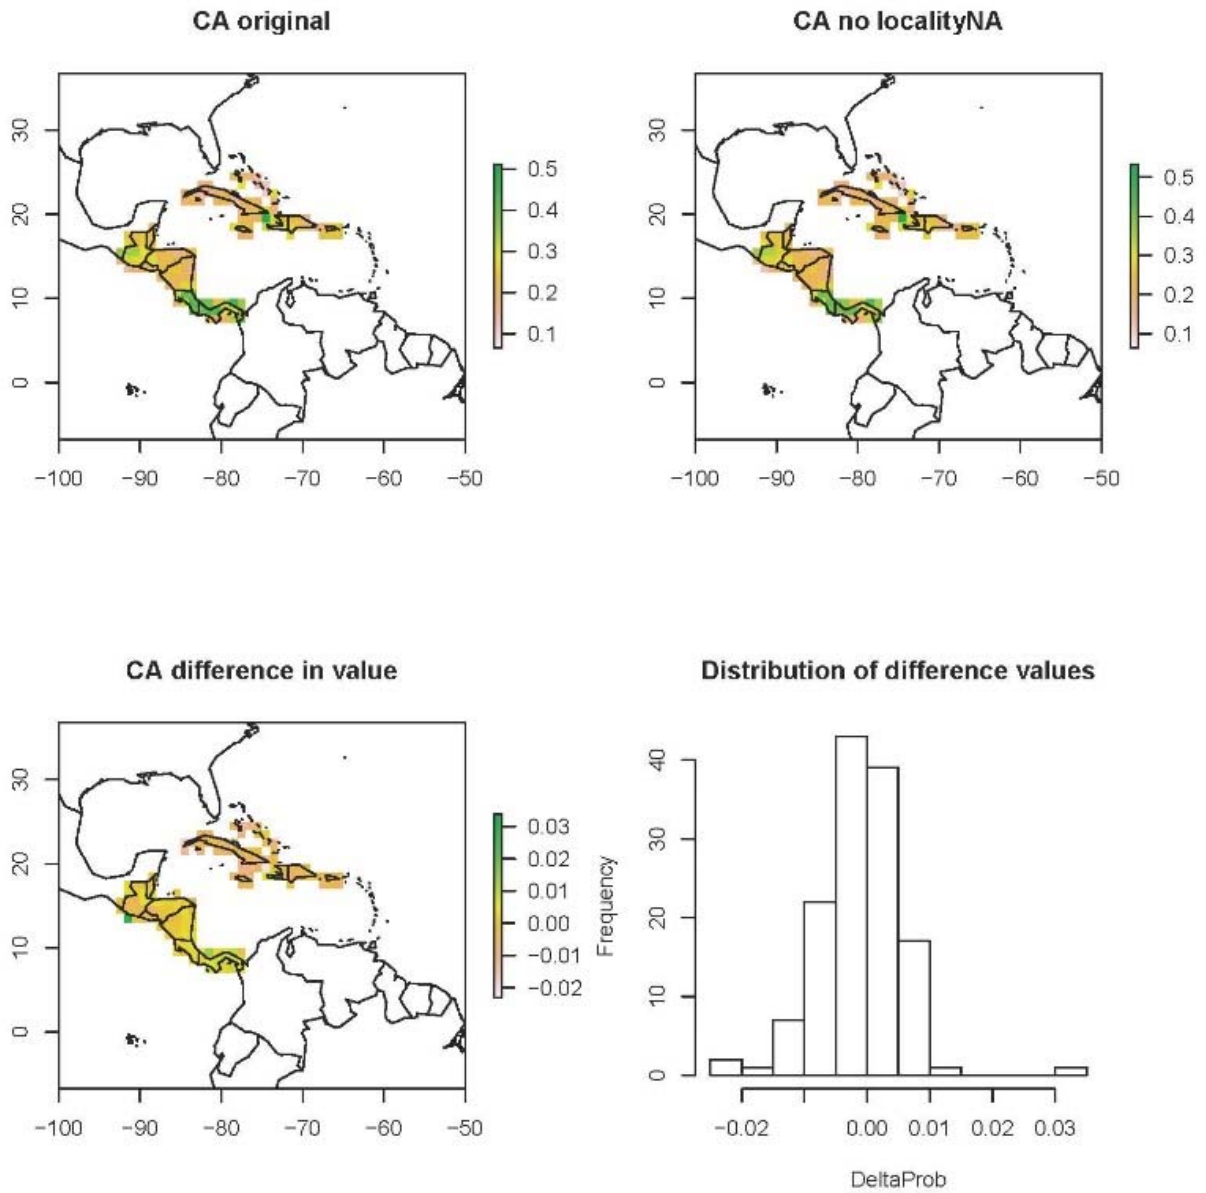

**Supplementary Figure 4** – Comparison between predictions obtained using the original GBIF dataset and the dataset with all observations without “LOCALITY” data excluded, for the Central American dataset. Top left: original predictions; top right: predictions with the filtered dataset; bottom left: difference in the prediction value per grid cell; bottom right: distribution of difference values. Values indicate per-cell probability of harboring non-LC taxa.

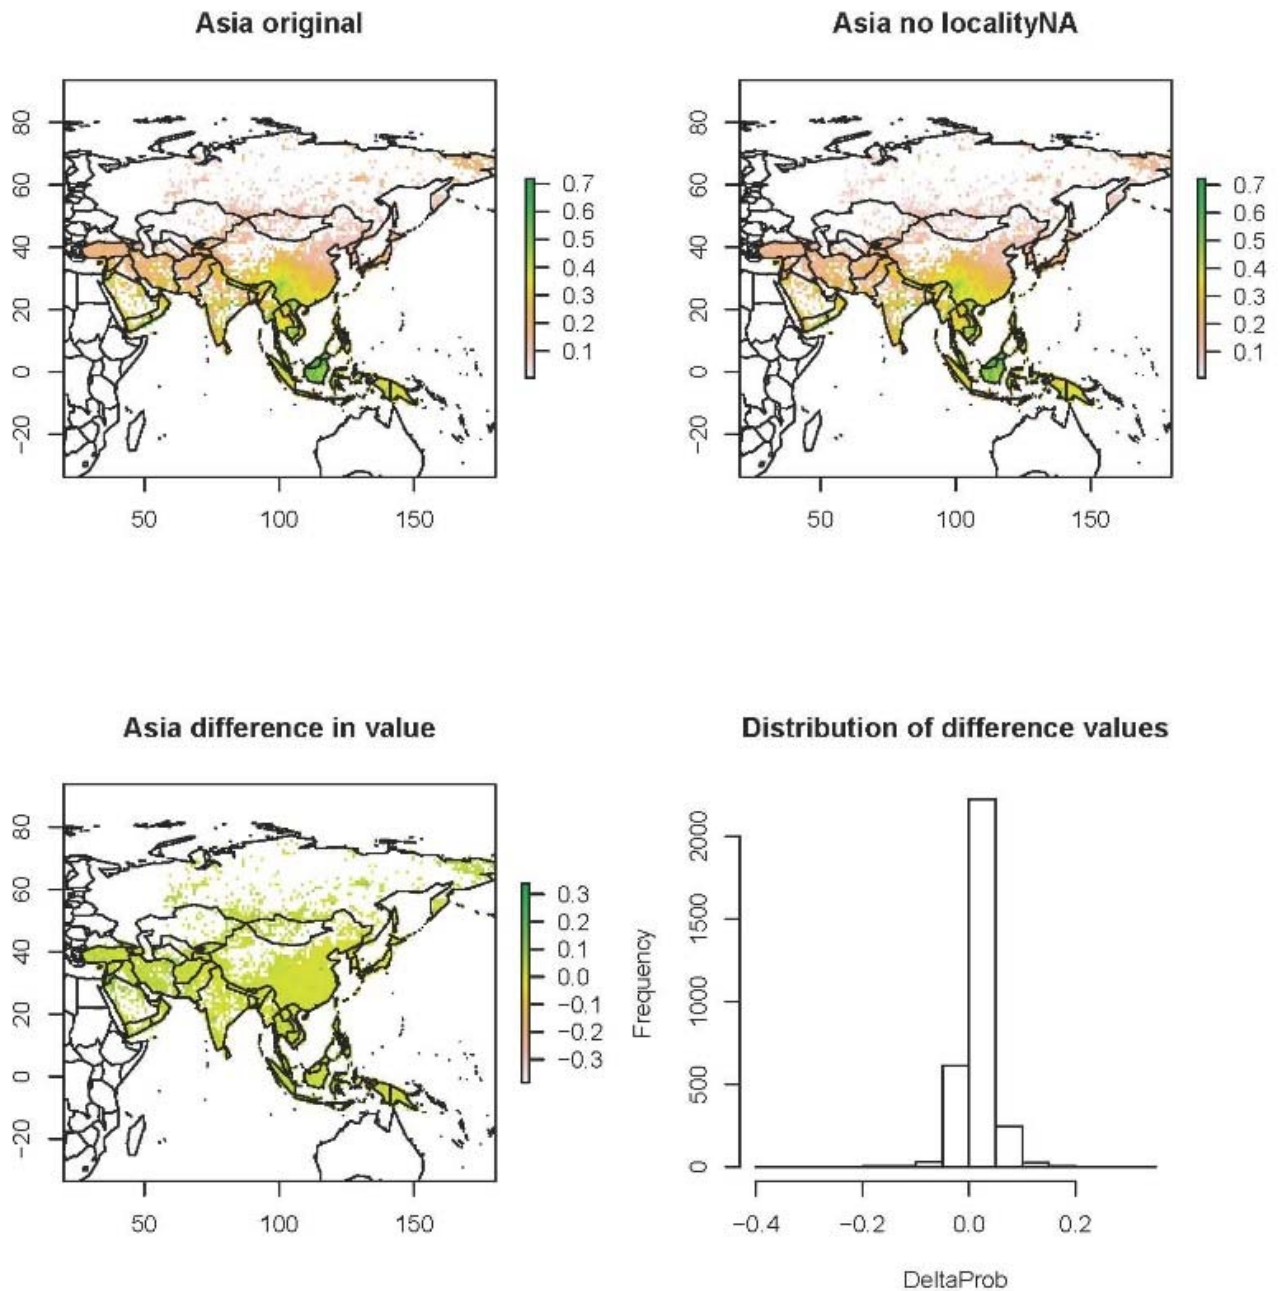

**Supplementary Figure 5** – Comparison between predictions obtained using the original GBIF dataset and the dataset with all observations without “LOCALITY” data excluded, for the Asian dataset. Top left: original predictions; top right: predictions with the filtered dataset; bottom left: difference in the prediction value per grid cell; bottom right: distribution of difference values. Values indicate per-cell probability of harboring non-LC taxa.
